# Supplementary material for: Searching for d0 spintronic materials: bismuthene monolayer doped with IVA-group atoms
Source: Royal Society of Chemistry journal article supplement (doi:10.1039/d2ra08278k), 2023-01-01
Supplement: d2ra08278k1.pdf [file d2ra08278k1.pdf]

## Searching for $d^0$ spintronic materials: Bismuthene monolayer doped with IVA-group atoms

Duy Khanh Nguyen,<sup>1</sup> To Vinh Bao,<sup>1</sup> Nguyen Anh Kha,<sup>1</sup> R. Ponce-Pérez,<sup>2</sup> J. Guerrero-Sanchez,<sup>2</sup> and D. M. Hoat<sup>3,4,\*</sup>

<sup>1</sup>High-Performance Computing Lab (HPC Lab), Information Technology Center, Thu Dau Mot University, Binh Duong Province, Vietnam

<sup>2</sup>Universidad Nacional Autónoma de México, Centro de Nanociencias y Nanotecnología, Apartado Postal 14, Ensenada, Baja California, Código Postal 22800, Mexico

<sup>3</sup>Institute of Theoretical and Applied Research, Duy Tan University, Ha Noi 100000, Viet Nam

<sup>4</sup>Faculty of Natural Sciences, Duy Tan University, Da Nang 550000, Viet Nam

\*Corresponding author: [dominhhoat@duytan.edu.vn](mailto:dominhhoat@duytan.edu.vn)

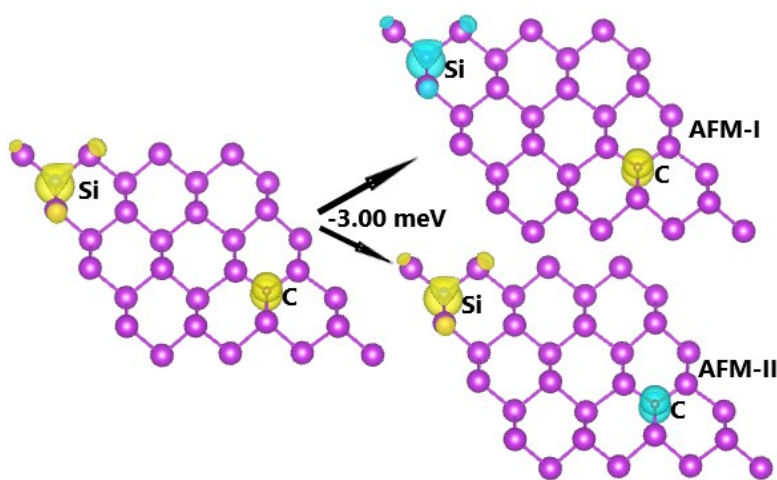

Figure S1: Spin ordering in the bismuthene monolayer co-doped with C and Si (Spin-up: yellow surface; Spin-down: cyan surface; Iso-surface value: 0.002).

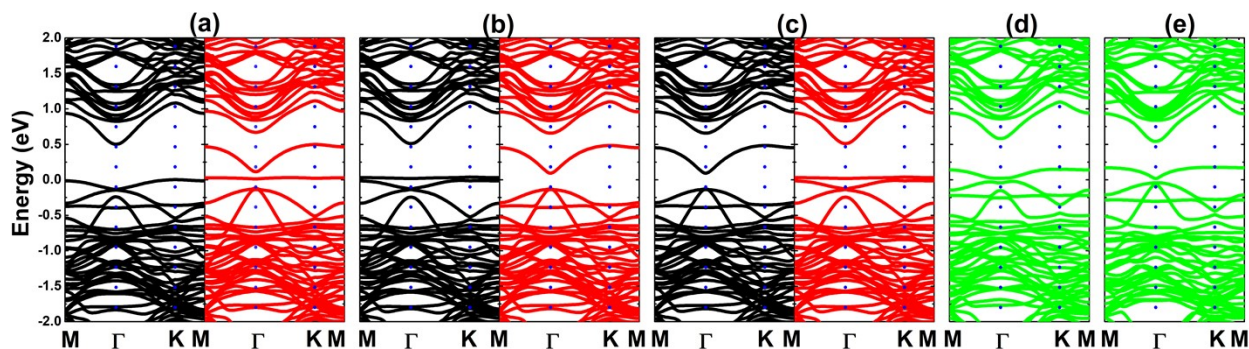

Figure.S2: Electronic band structure (Spin-up: black curve; Spin-down: red curve; Non spin-polarized: green curve; The Fermi level is set to 0 eV) of the bismuthene monolayer co-doped with (a-b-c) C and Si (a: FM, b: AFM-I, c: AFM-II), (d) C and Ge, and (e) Si and Ge

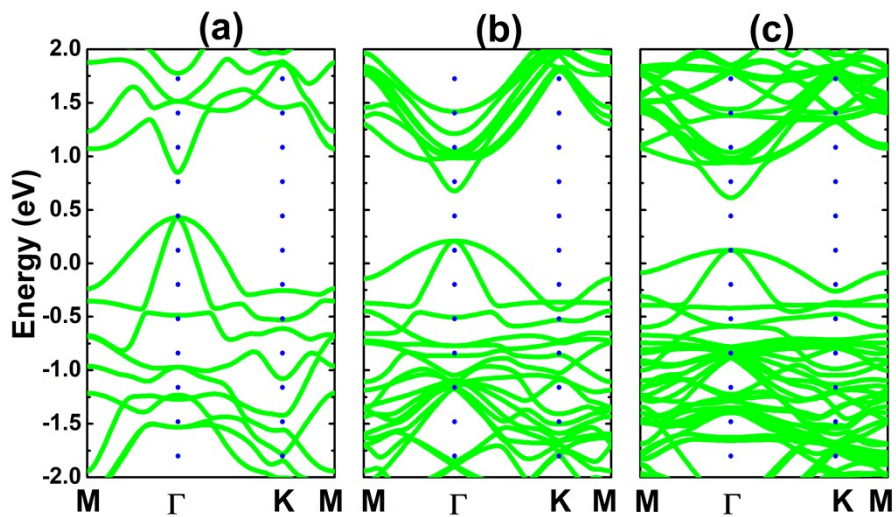

Figure 3. Electronic band structure (Non spin-polarized: green curve; The Fermi level is set to 0 eV) of the Sn-doped bismuthene monolayer with doping level of (a) 25%, (b) 11.11%, and (c) 6.25%.

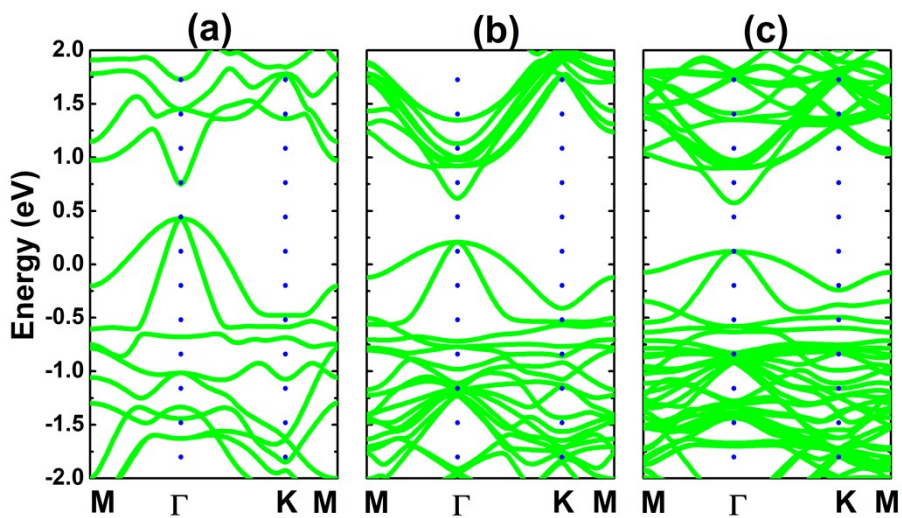

Figure 4. Electronic band structure (Non spin-polarized: green curve; The Fermi level is set to 0 eV) of the Pb-doped bismuthene monolayer with doping level of (a) 25%, (b) 11.11%, and (c) 6.25%.
